# Supplementary material for: Attributing correlation skill of dynamical global precipitation forecasts to statistical ENSO teleconnection using a set theory based approach
Source: Copernicus journal article supplement (doi:10.5194/hess-2021-328), 2021-06-28
Supplement: Supplementary file [file hess-2021-328-AC3-supplement.pdf]

## Response

*Anonymous Referee #3:*

*Referee comment on "Attributing correlation skill of dynamical global precipitation forecasts to statistical ENSO teleconnection using a set theory based approach" by Tongtiegang Zhao et al., Hydrol. Earth Syst. Sci. Discuss., <https://doi.org/10.5194/hess-2021-328-RC3>, 2021*

*None.*

Thank you. We have conducted a thorough revision to improve the paper.
