# Supplementary material for: Attributing correlation skill of dynamical global precipitation forecasts to statistical ENSO teleconnection using a set theory based approach
Source: Copernicus journal article supplement (doi:10.5194/hess-2021-328), 2021-06-28
Supplement: Supplementary file [file hess-2021-328-AC4-supplement.zip]

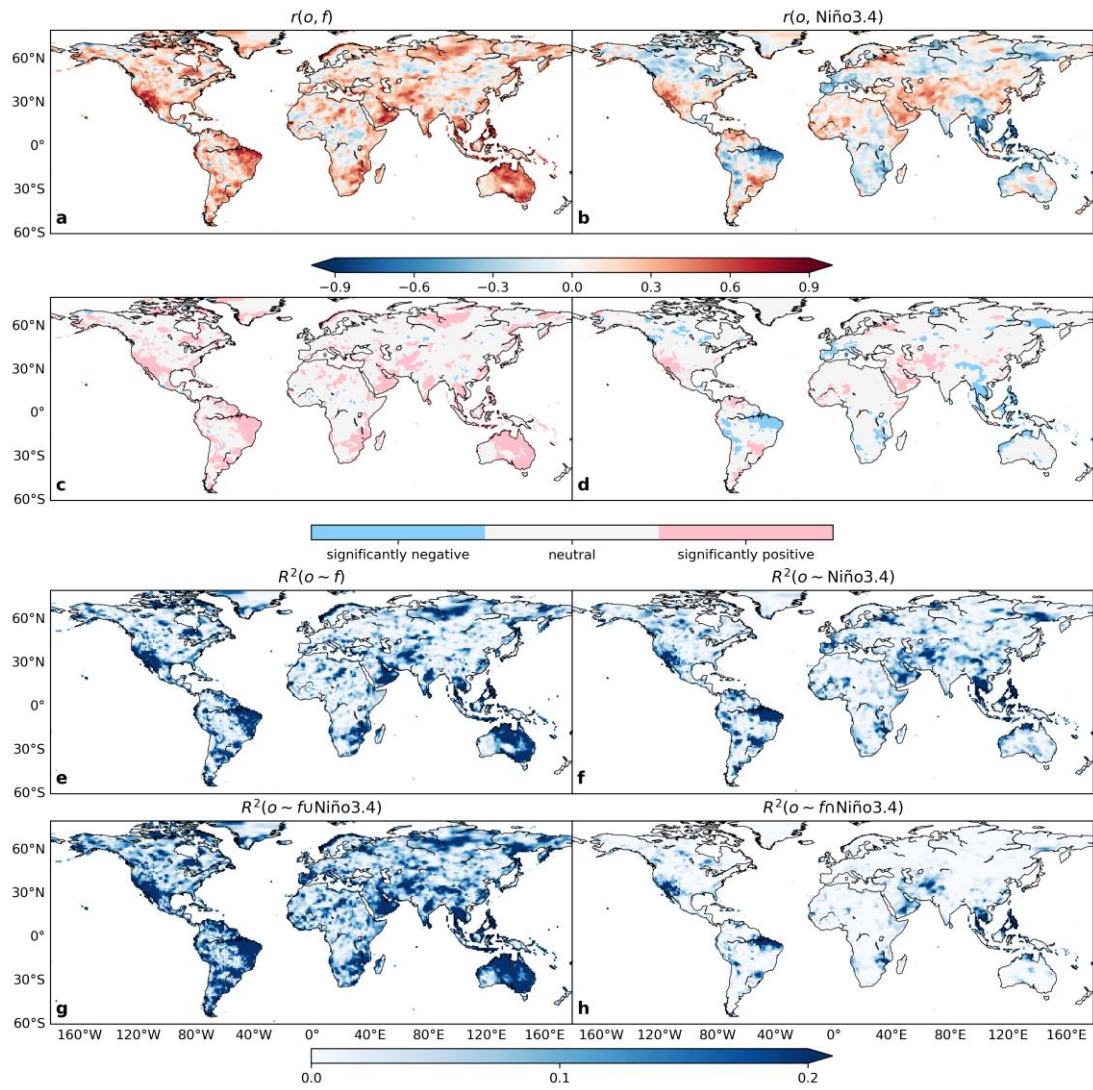

Figure S1: As for Figure 4 but for MAM precipitation forecasts generated in March.

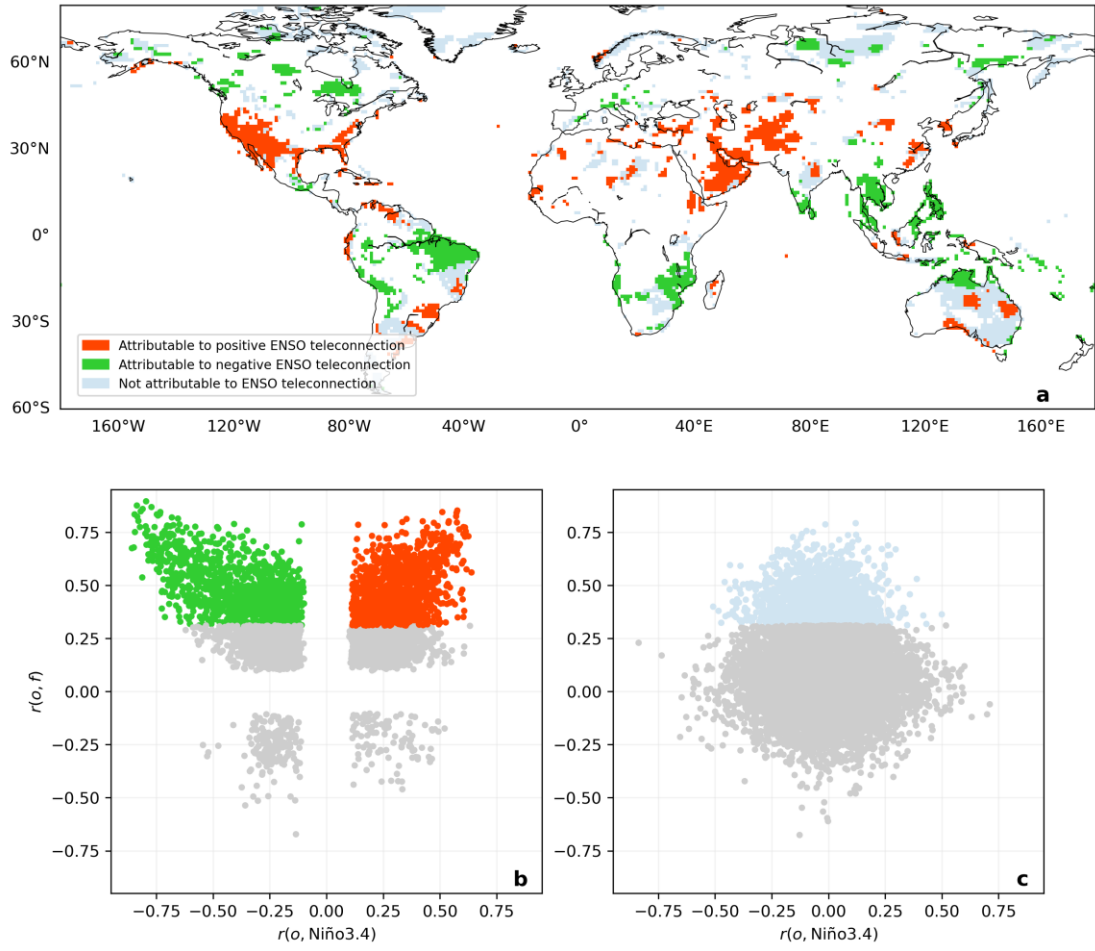

Figure S2: As for Figure 6 but for MAM precipitation forecasts generated in March.

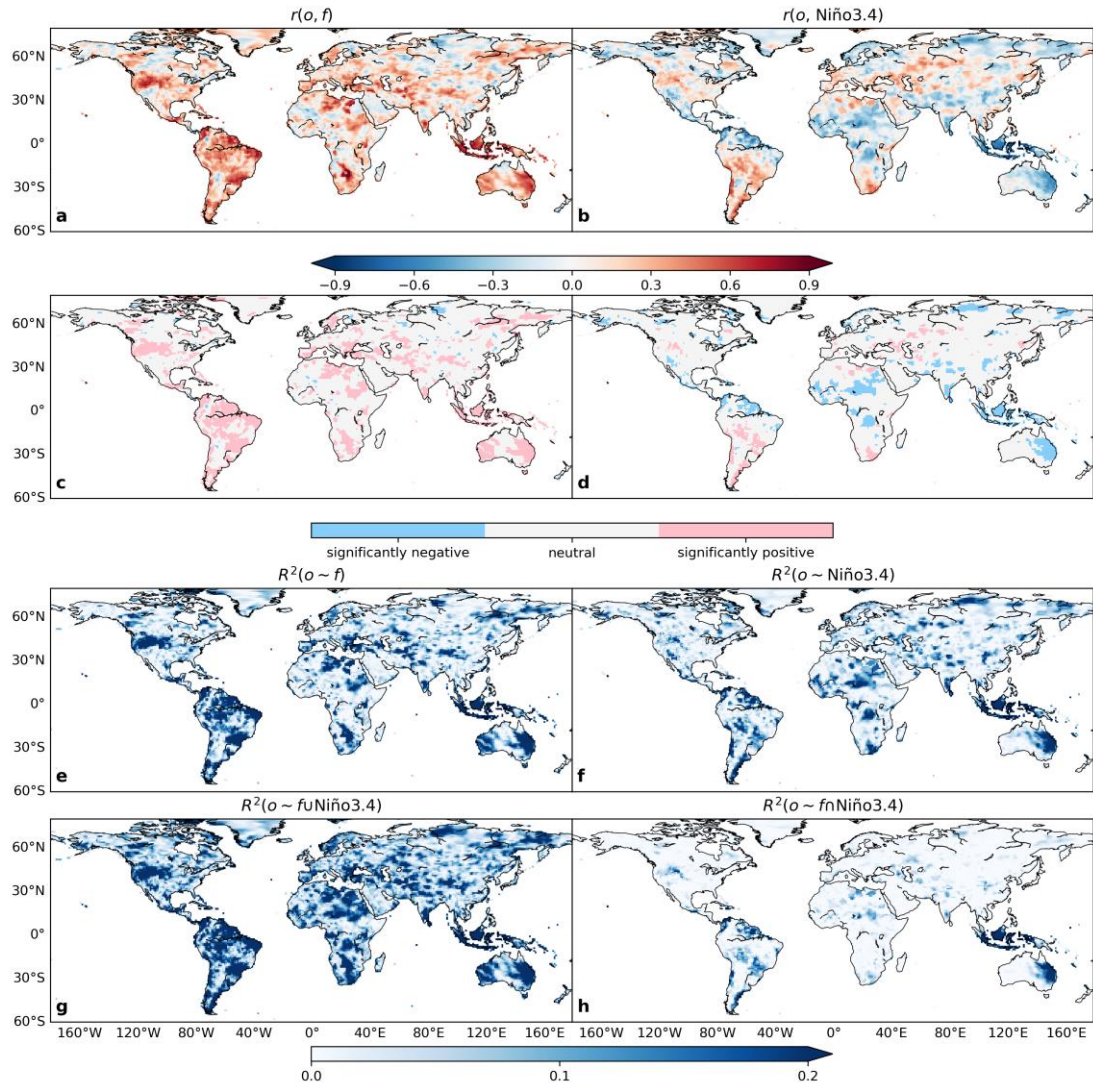

Figure S3: As for Figure 4 but for JJA precipitation forecasts generated in June.

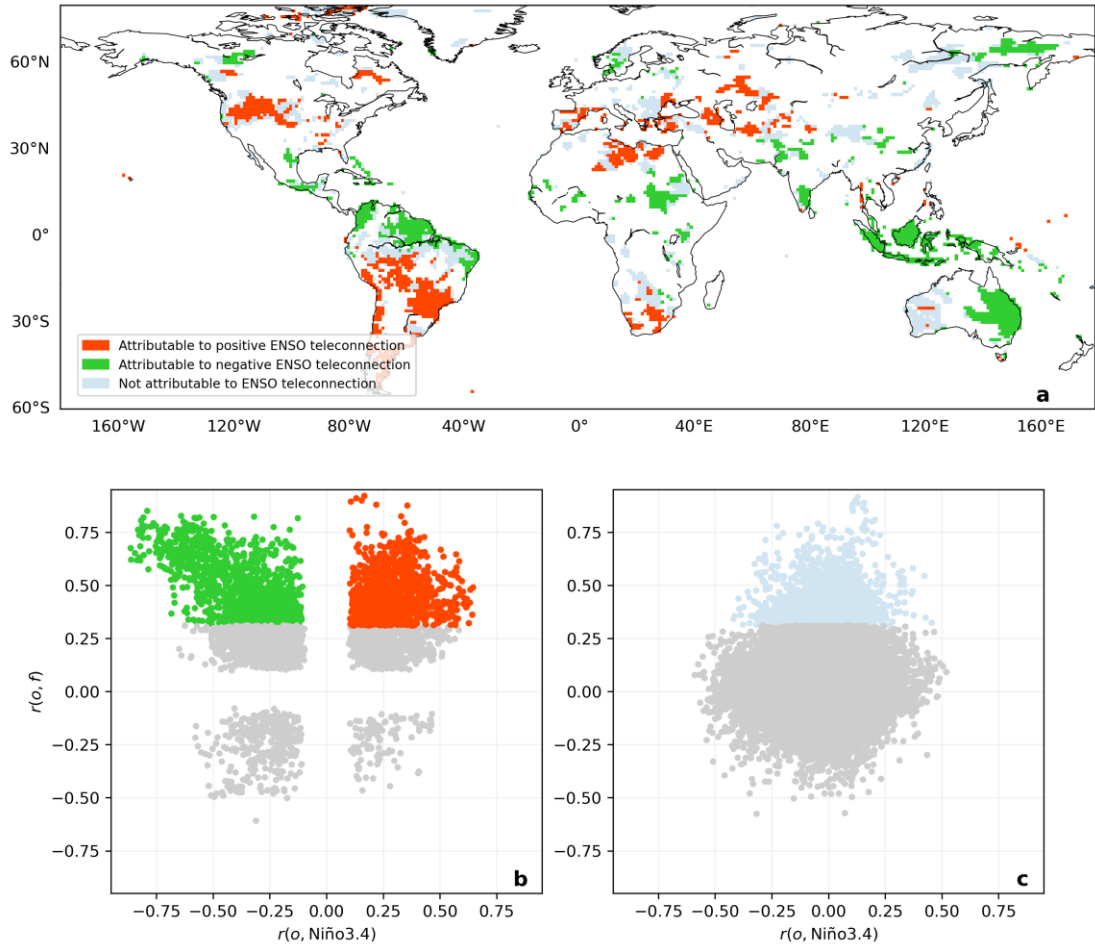

Figure S4: As for Figure 6 but for JJA precipitation forecasts generated in June.



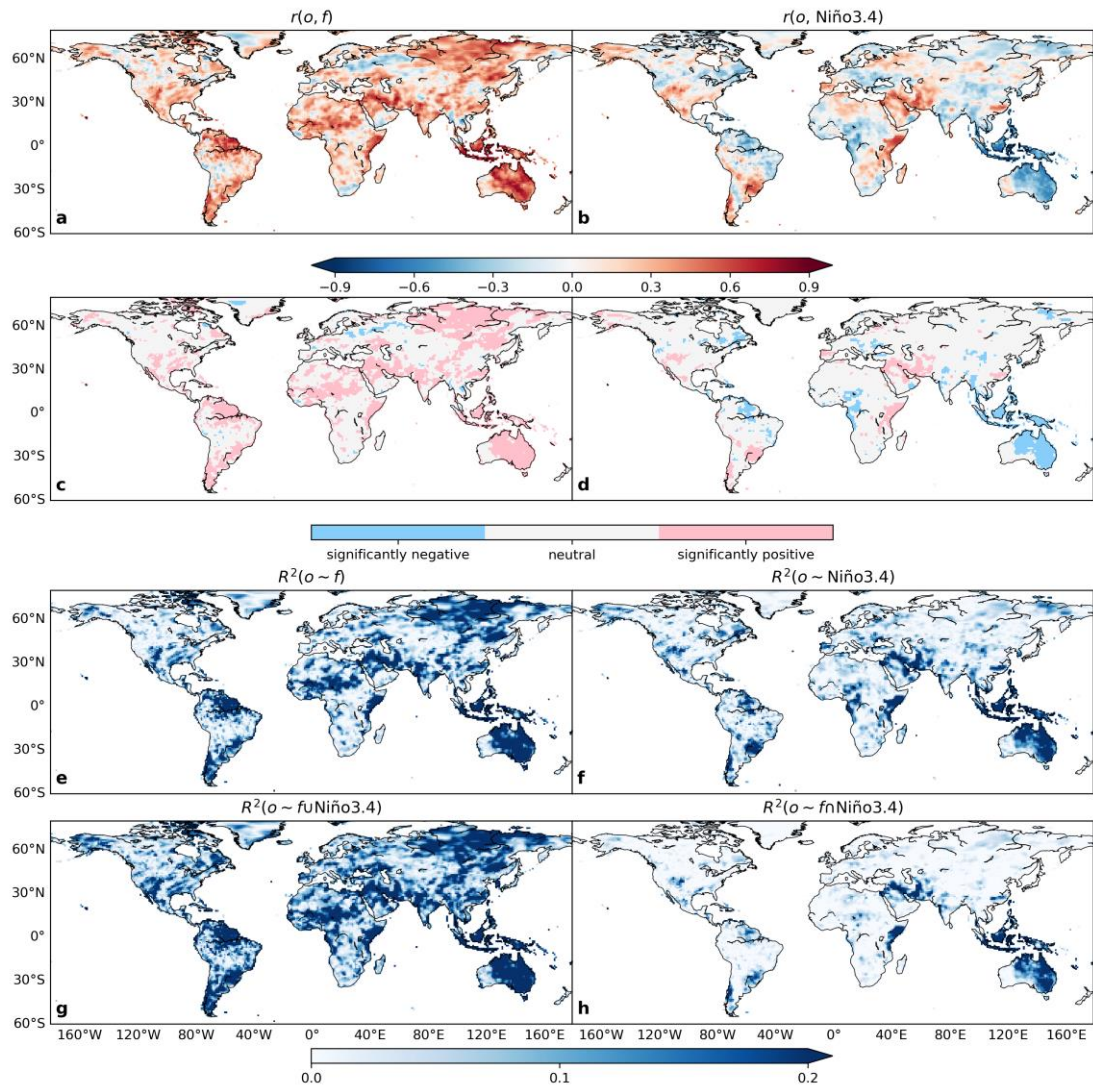

Figure S5: As for Figure 4 but for SON precipitation forecasts generated in September.

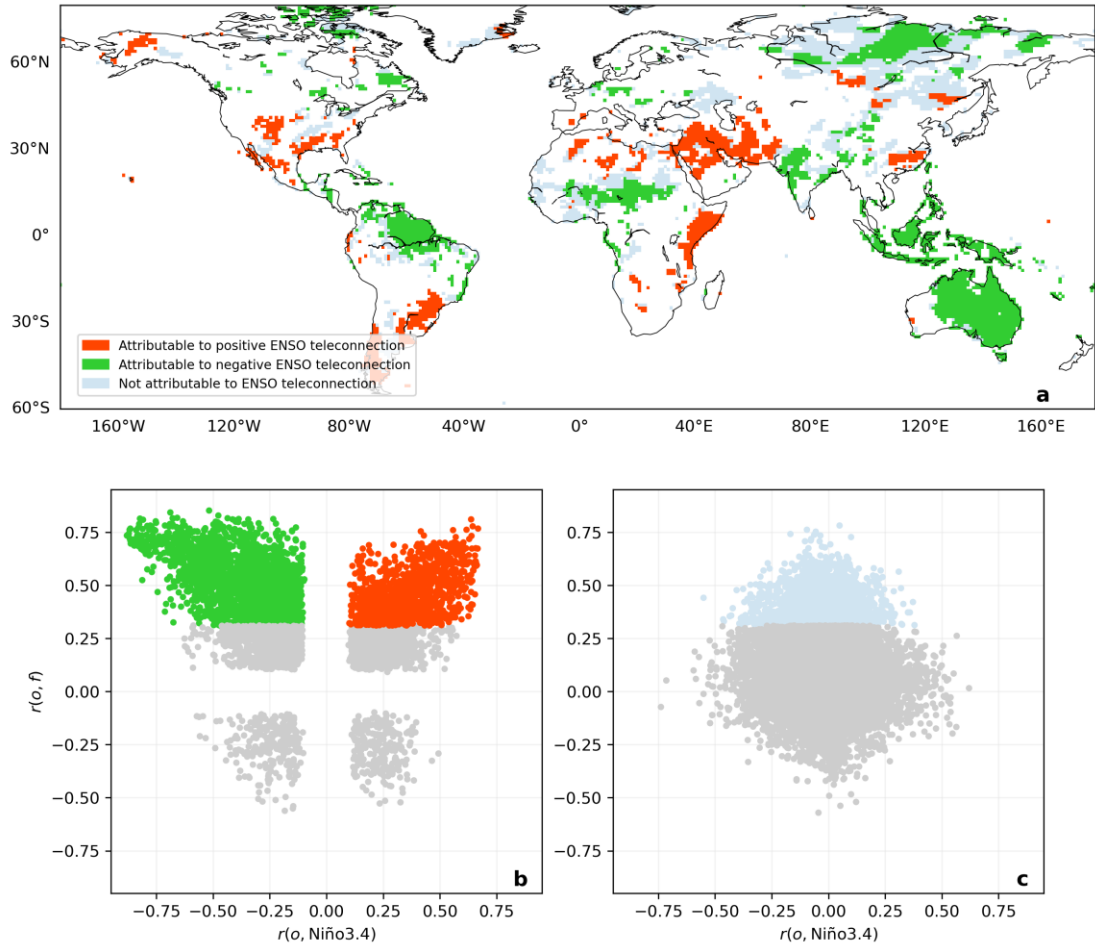

Figure S6: As for Figure 6 but for SON precipitation forecasts generated in September.

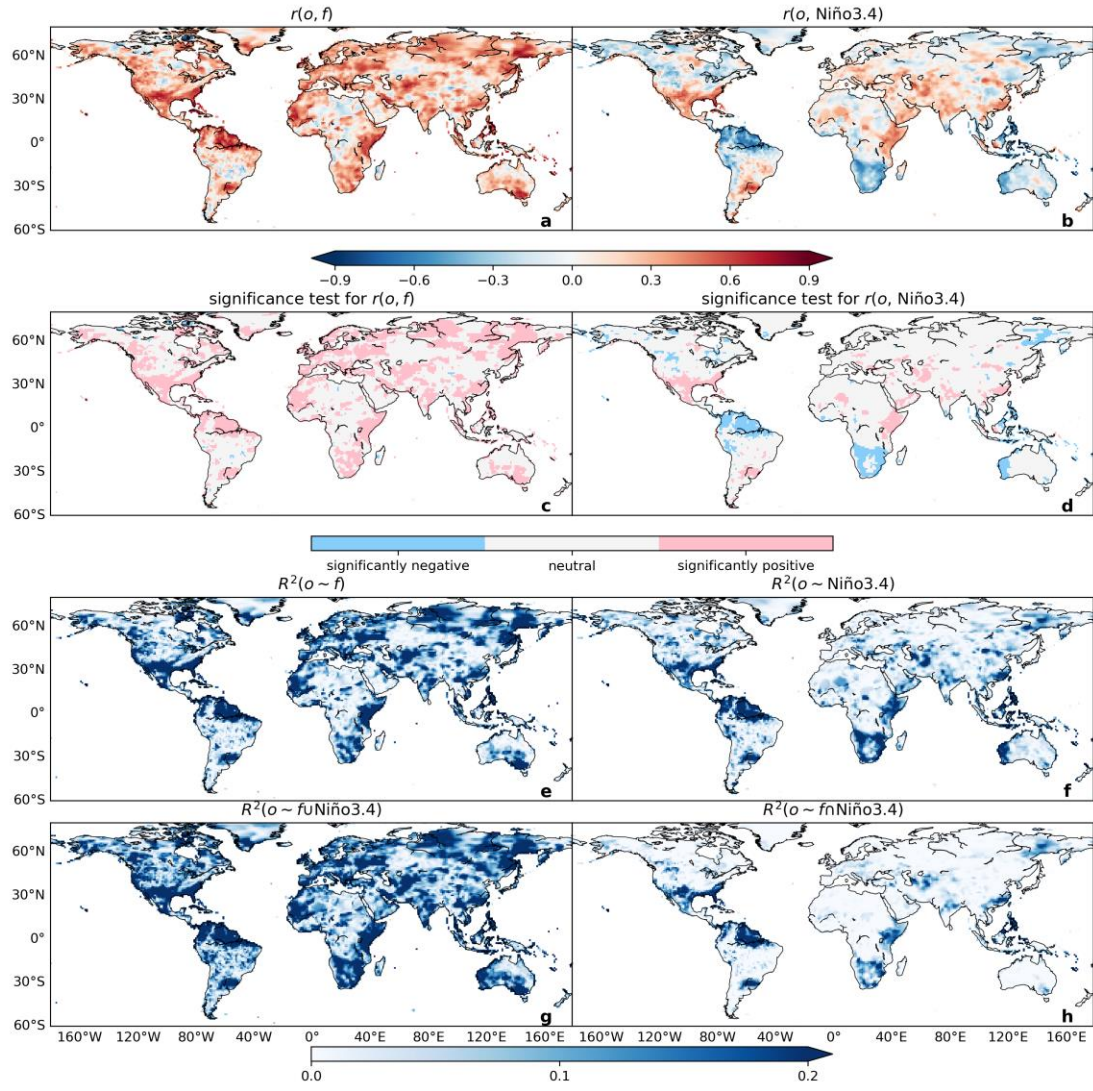

Figure S7: As for Figure 4 but for Niño3.4 index in November (1-month lag ENSO teleconnection).

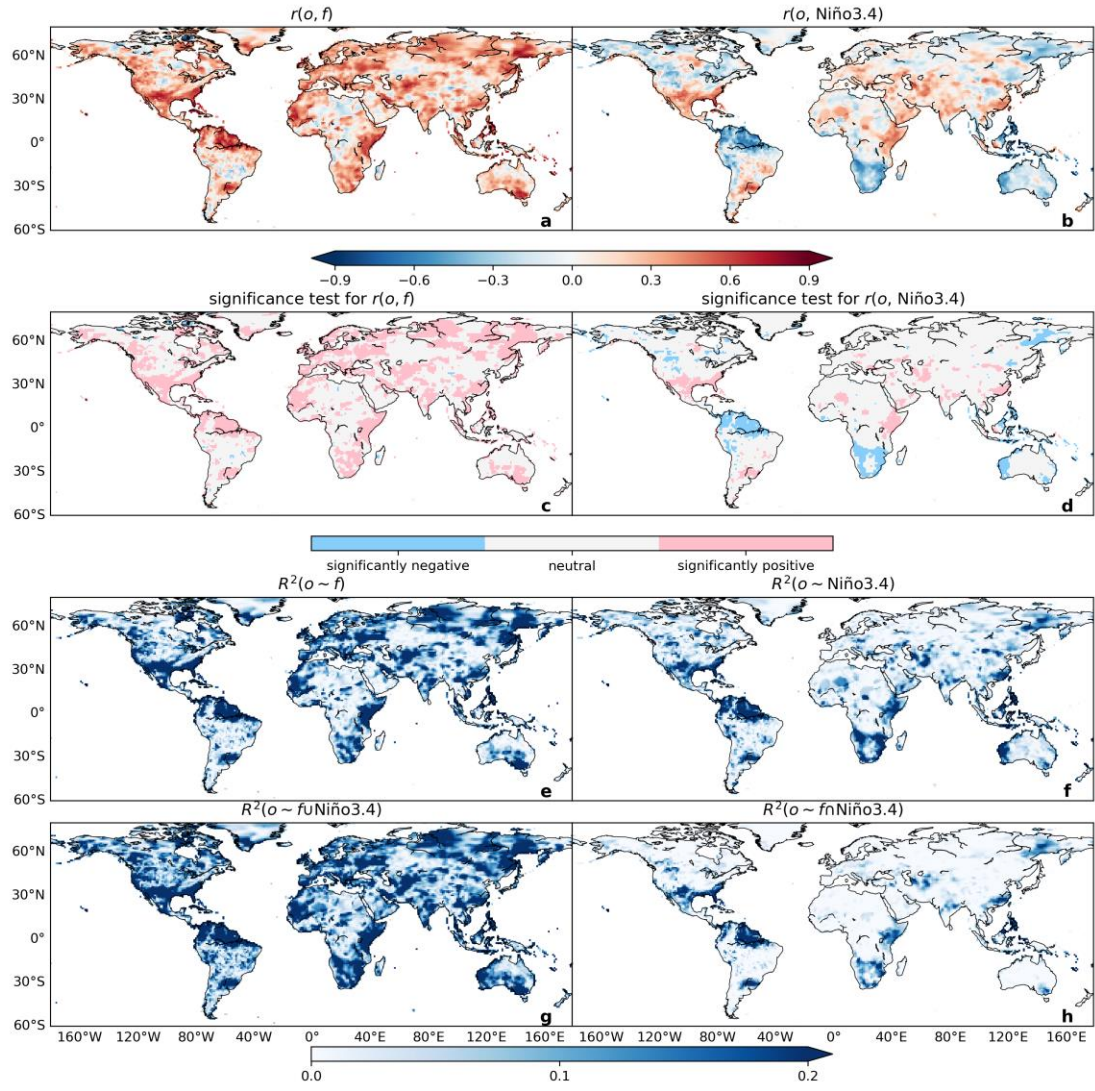

Figure S8: As for Figure 4 but for ahead Niño3.4 index in October (2-month lag ENSO teleconnection).



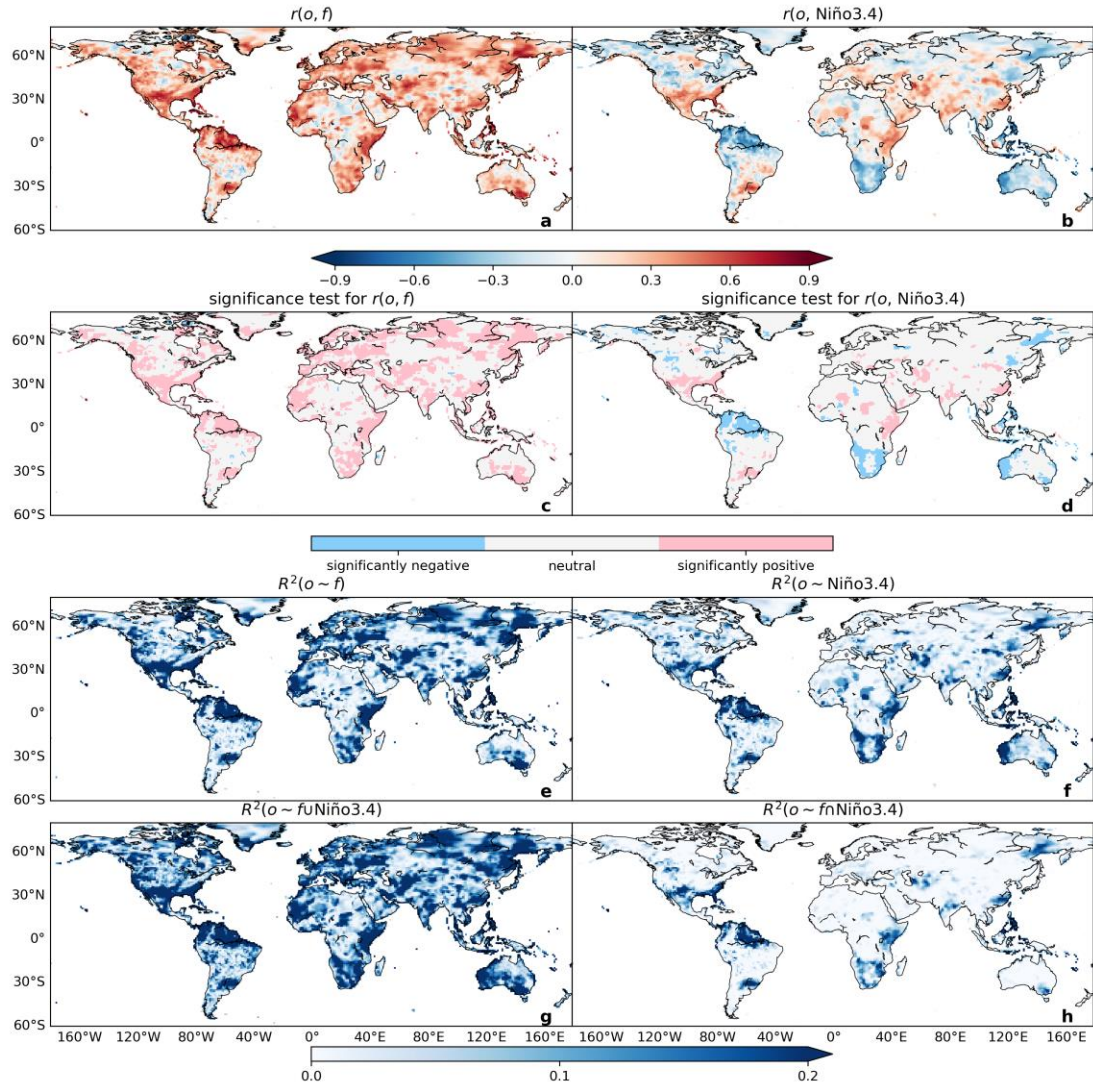

Figure S9: As for Figure 4 but for Niño3.4 index in September (3-month lag ENSO teleconnection).

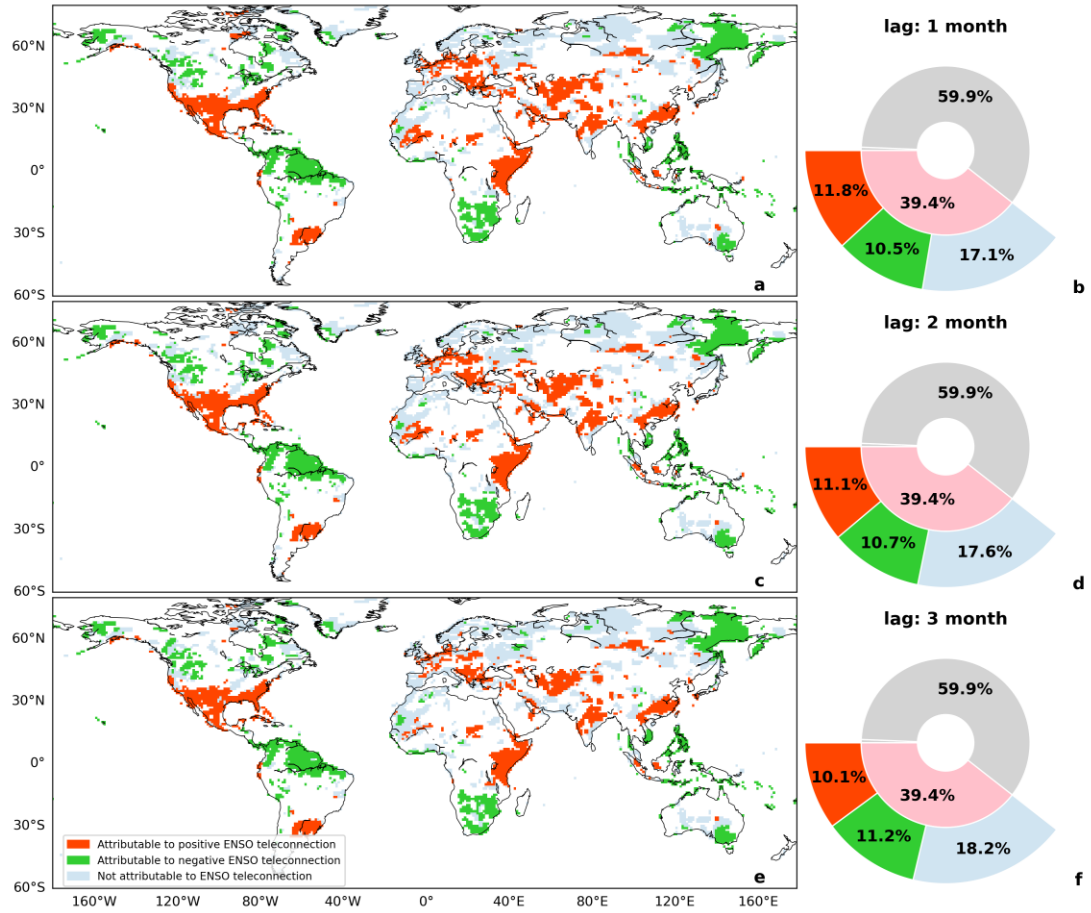

Figure S10: Spatial maps (left column) and sunburst diagrams (right column) of the three cases of attribution in DJF for Niño3.4 index in (a-b) November (1-month lag), (c-d) October (2-month lag) and (e-f) September (3-month lag) Niño3.4 index.

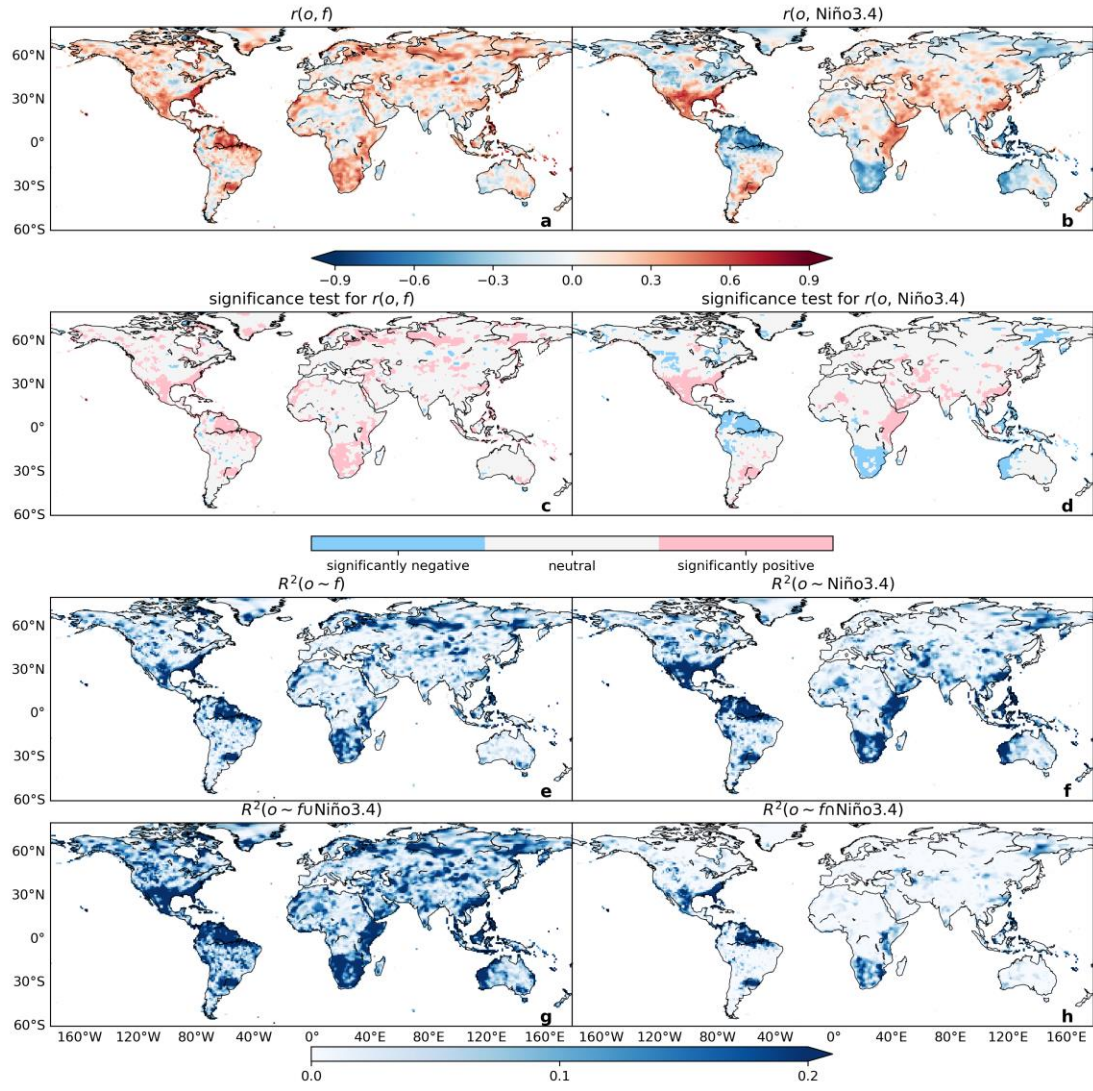

Figure S11: As for Figure 4 but for 1-month lead DJF seasonal precipitation forecasts generated in November.



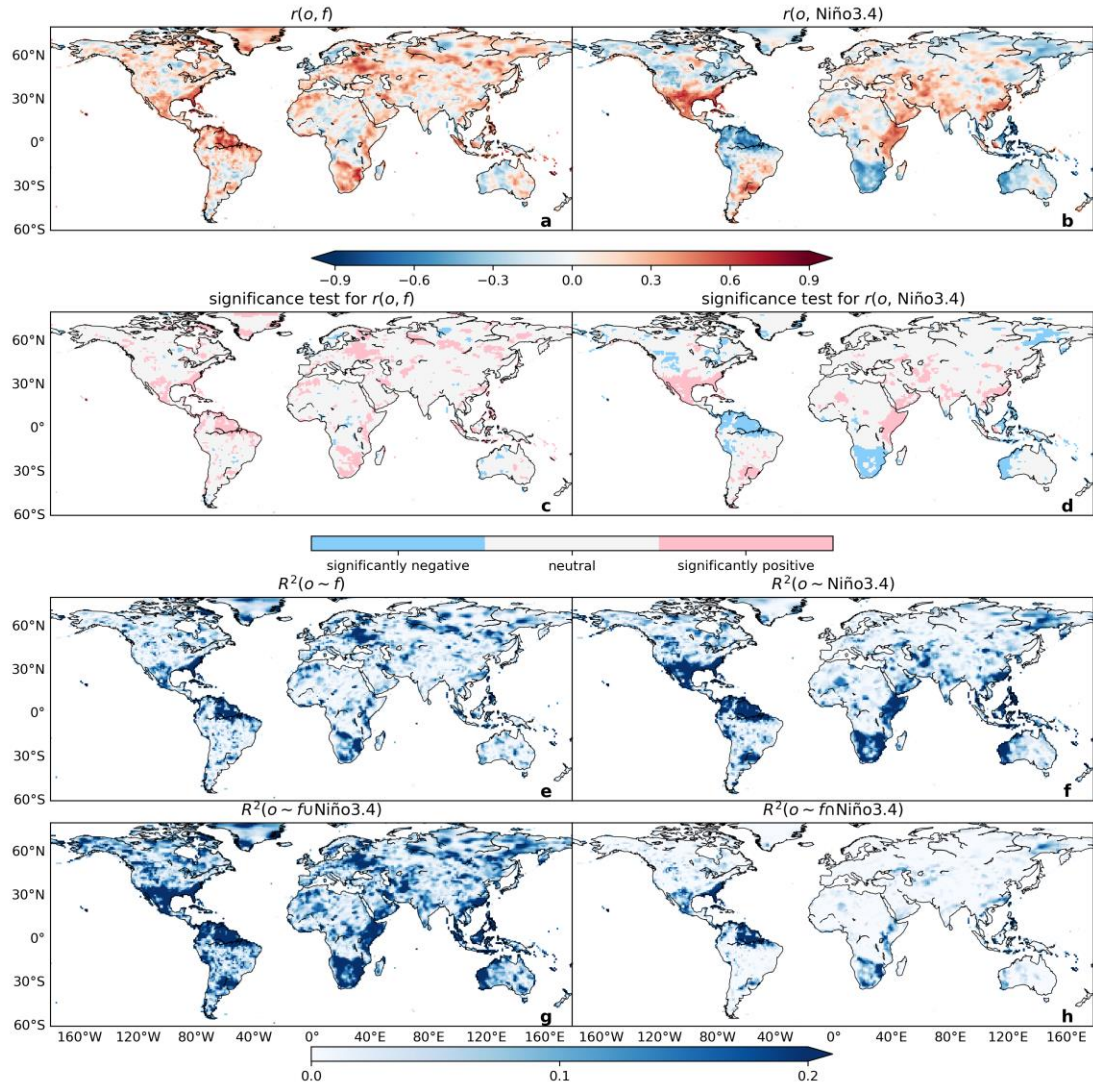

Figure S12: As for Figure 4 but for 2-month lead DJF seasonal precipitation forecasts generated in October.



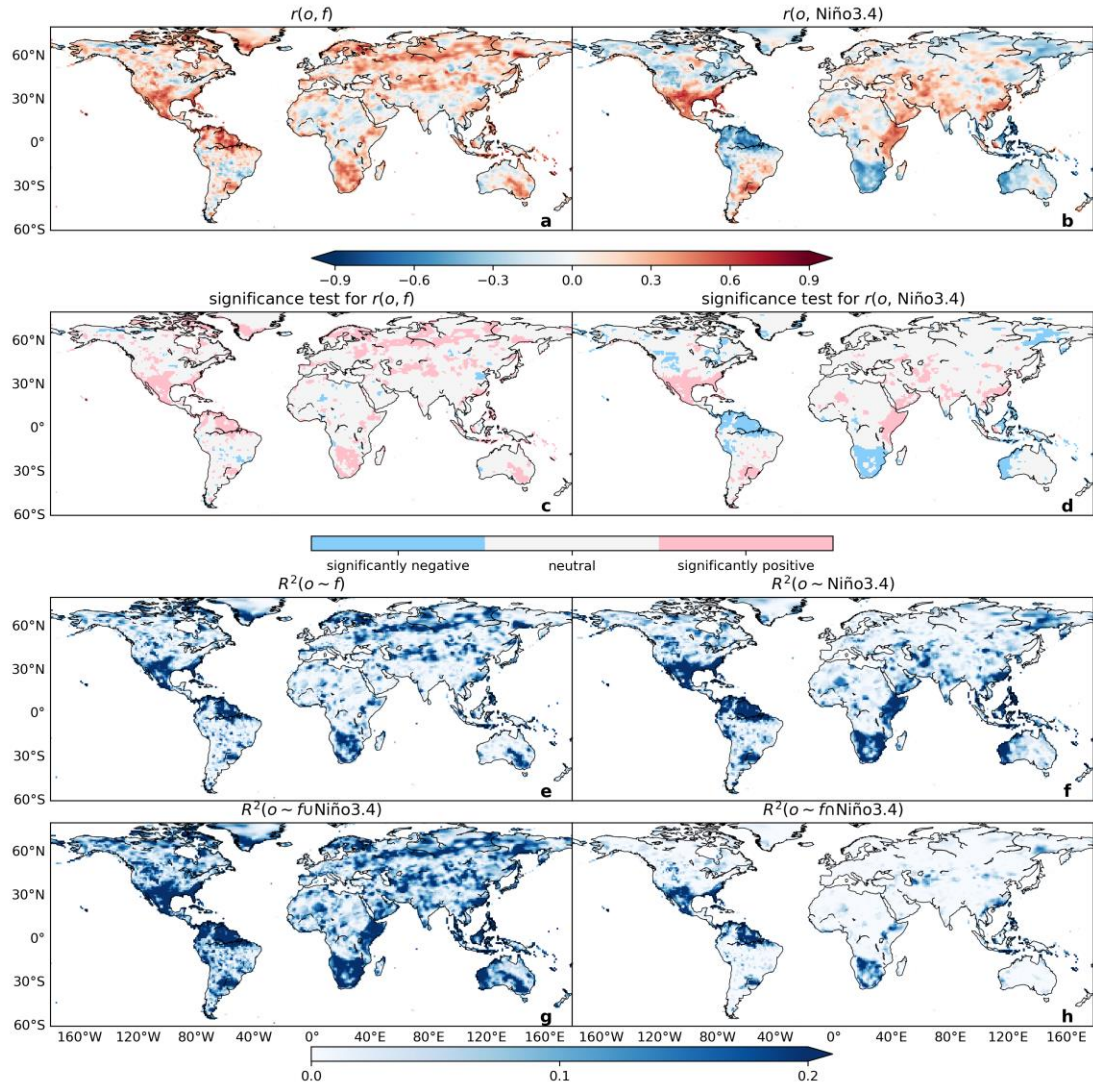

Figure S13: As for Figure 4 but for 3-month lead DJF seasonal precipitation forecasts generated in September.

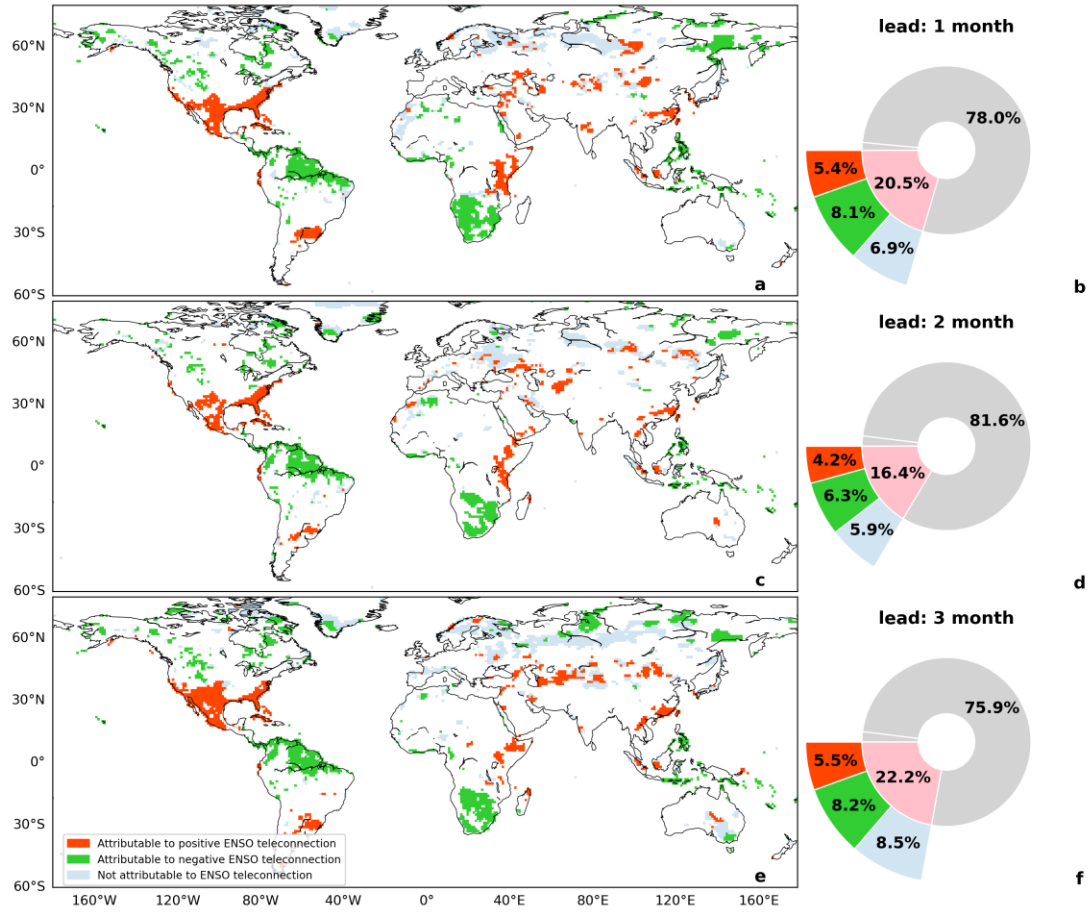

Figure S14: Spatial maps (left column) and sunburst diagrams (right column) of the three cases of attribution in DJF for DJF seasonal forecasts generated in (a-b) November (1-month lead), (c-d) October (2-month lead) and (e-f) September (3-month lead).
